# Supplementary material
Source: PubMed Central journal article supplement (PMC4614128)
Supplement: 0f6793748fab930ae67b1b6346781dfd_brain-2014-01842-File016.pdf [file 0f6793748fab930ae67b1b6346781dfd_brain-2014-01842-File016.pdf]

## Table S4

Patient samples used for immunohistochemical studies

| <u>Diagnosis/Pathology</u> | <u>Age</u> | <u>Gender</u> | <u>Race</u> |
|----------------------------|------------|---------------|-------------|
| MS – Acute                 | 31         | F             | W           |
| MS - Acute                 | 54         | F             | W           |
| MS - Chr. Act.             | 32         | F             | W           |
| MS - Chr. Act.             | 56         | F             | W           |
| MS - Chr. Act.             | 36         | F             | W           |
| MS - Chr. Act.             | 57         | F             | B           |
| MS - Chr. Act.             | 69         | M             | W           |
| MS - Chr. Sil.             | 52         | F             | W           |
| MS - Chr. Sil.             | 46         | M             | W           |
| Normal                     | 59         | F             | B           |
| Normal                     | 59         | M             | W           |
| Normal                     | 45         | F             | W           |
| Normal                     | 56         | F             | W           |
| Normal                     | 40         | M             | H           |
| OND - ALS                  | 49         | F             | W           |
| OND - HIV                  | 33         | M             | B           |
| OND - HIV                  | 38         | M             | H           |
| OND - HIV                  | 58         | F             | B           |
