# Supplementary material
Source: PubMed Central journal article supplement (PMC4614128)
Supplement: 4af35a4678009be988a72f3568011adb_brain-2014-01842-File012.pdf [file 4af35a4678009be988a72f3568011adb_brain-2014-01842-File012.pdf]

# Table S1

## VEGF-A-regulated genes in human CNS microvascular endothelial cultures

|                             | <u>Gene Symbol</u>                   | <u>Name</u>                              | <u>PMID</u>     | <u>Angio genesis</u> | <u>Vegf</u> | <u>Migr.</u> | <u>ncRNA</u> | <u>Prolif.</u> | <u>Perm.</u> |
|-----------------------------|--------------------------------------|------------------------------------------|-----------------|----------------------|-------------|--------------|--------------|----------------|--------------|
| Most strongly upregulated   | RGCC                                 | Regulator of cell cycle                  | PMID: 11687586  |                      |             |              |              | X              |              |
|                             | ESM1                                 | Endocan                                  | PMID: 23243026  | X                    | X           |              |              |                |              |
|                             | FABP4                                | Fatty acid BP 4                          | PMID: 24939870  | X                    | X           |              |              |                |              |
|                             | PODXL                                | Podocalyxin-like                         | PMID: 18456258  |                      |             |              | X            |                |              |
|                             | APLN                                 | Apelin                                   | PMID: 16750822  | X                    |             |              |              |                |              |
|                             | AKAP12                               | SSeCKS                                   | PMID: 12808449  |                      |             |              |              |                | X            |
|                             | TNFSF4                               | Gp34                                     | PMID: 10914497  |                      |             |              |              | X              |              |
|                             | ETS1                                 | Ets-1 transcription factor               | PMID: 11795259  | X                    |             |              |              |                |              |
|                             | ANGPT2                               | Angiopoietin-2                           | PMID: 16056241  |                      |             |              |              |                | X            |
|                             | MGST2                                | microsomal glutathione S-transferase 2   | PMID: 11322876  |                      |             |              |              |                | X            |
|                             | CD34                                 | CD34                                     | PMID: 18987355  |                      |             |              | X            |                |              |
|                             | GPR116                               | Gpr116                                   | PMID: 24008316  |                      |             |              | X            |                |              |
|                             | C10orf10                             | DEPP                                     | PMID: 15977181  | X                    |             |              |              |                |              |
|                             | SLC12A2                              | Nkcc1                                    | PMID: 20035575  |                      |             |              |              |                |              |
|                             | PNP                                  | Purine nucleoside phosphorylase          | PMID: 8987089   |                      |             |              |              |                |              |
|                             | ITGA6                                | Integrin alpha 6                         | PMID: 20570893  | X                    | X           |              |              |                |              |
|                             | TCF4                                 | Tcf4                                     | PMID: 20231428  | X                    |             |              |              |                | X            |
|                             | HECW2                                | Nedl2                                    | PMID: 24163370  |                      |             |              |              | X              |              |
|                             | ANTXR1                               | Anthrax toxin receptor 1 / TEM8          | PMID: 15777794  |                      |             |              | X            |                |              |
|                             | PGF                                  | PlGF, placental growth factor            | PMID: 1924389   | X                    | X           |              |              |                |              |
|                             | SULF2                                | Sulfatase 2                              | PMID: 16417632  |                      | X           |              |              |                |              |
|                             | DYSF                                 | Dysferlin                                | PMID: 20724702  |                      |             |              | X            | X              |              |
|                             | CTNNB1                               | Beta catenin                             | PMID: 24590145  |                      |             |              |              |                | X            |
|                             | NEDD9                                | Neural precursor, dev. downregulated-9   | PMID: 20498643  |                      | X           | X            |              |                |              |
|                             | LPNH2                                | Latrophilin 2                            | PMID: 17016846  |                      |             |              |              |                |              |
|                             | MMP10                                | Matrix metalloproteinase 10              | PMID: 20432469  | X                    | X           |              |              |                |              |
|                             | CD55                                 | Decay accelerating factor                | PMID: 1688581   |                      |             |              |              |                |              |
|                             | RASGRP3                              | Ras guanine-releasing protein 3          | PMID: 15572660  | X                    |             |              |              |                |              |
|                             | NDRG1                                | N-myc downstream regulated               | PMID: 198281151 | X                    |             |              |              |                |              |
|                             | PARBPB                               | PARP-1 binding protein                   | PMID: 20931645  |                      |             |              |              | X              |              |
|                             | PLXNA2                               | Plexin A2                                | PMID: 15739224  |                      |             | X            |              |                |              |
|                             | CXCR4                                | Chemokine receptor CXCR4                 | PMID: 9634237   | X                    | X           |              |              |                |              |
|                             | FAM89A                               | FAM89A                                   | None            |                      |             |              |              |                |              |
|                             | HLX                                  | Homeobox TF HLX1                         | PMID: 21224470  | X                    | X           |              |              |                |              |
|                             | TSPAN13                              | Tetraspanin-13                           | PMID: 17486367  |                      |             |              |              | X              |              |
|                             | KIT                                  | c-Kit                                    | PMID: 14515175  | X                    | X           |              |              |                |              |
|                             | VASH1                                | Vasohibin1                               | PMID: 23100270  | X                    | X           |              |              |                |              |
|                             | SYNM                                 | Synemin                                  | PMID: 19124017  |                      |             |              | X            |                |              |
|                             | PDGFD                                | Platelet derived growth factor -d        | PMID: 19028801  |                      |             |              |              |                |              |
|                             | PDGFB                                | Platelet derived growth factor -b        | PMID: 19164813  | X                    |             |              |              |                |              |
|                             | DUSP5                                | Dual-specificity phosphatase-5           | PMID: 19741200  |                      | X           |              |              | X              |              |
|                             | UACA                                 | Nucling                                  | PMID: 14961764  |                      |             |              |              |                |              |
|                             | A2M                                  | Alpha 2 macroglobulin                    | PMID: 10862607  |                      |             | X            |              |                |              |
|                             | GMFG                                 | Glia maturation factor                   | PMID: 16873721  | X                    |             | X            |              |                |              |
|                             | SPRY1                                | Sprouty 1                                | PMID: 14515177  | X                    | X           |              |              |                |              |
| SPRY4                       | Sprouty 4                            | PMID: 20835243                           | X               | X                    |             |              |              |                |              |
| PRDM1                       | BLIMP1                               | PMID: 24477914                           |                 |                      |             |              |              |                |              |
| MEF2C                       | Myocyte enhancer factor 2c           | PMID: 24988463                           | X               |                      |             |              |              |                |              |
| PALD1                       | Paladin 1                            | PMID: 22354871                           | X               |                      |             |              |              |                |              |
| HSD17B2                     | Hydroxysteroid (17β) dehydrogenase 2 | PMID: 9768688                            |                 |                      |             |              |              |                |              |
| MYCN                        | N-Myc                                | PMID: 10969812                           | X               |                      |             |              |              |                |              |
| PCDH19                      | Protocadherin 19                     | PMID: 22704920                           |                 |                      |             |              |              |                |              |
| Most strongly downregulated | RNU6ATAC                             | RNA, U6atac small nuclear                | PMID: 11971955  |                      |             |              |              | X              |              |
|                             | TLL1                                 | Tolloid-like 1                           | PMID: 15591058  | X                    |             |              |              |                |              |
|                             | MAFB                                 | MAFB                                     | PMID: 8620536   | X                    |             |              |              |                |              |
|                             | GDF3                                 | Growth differentiation factor-3          | PMID: 17610369  |                      |             |              |              |                |              |
|                             | KLRG1                                | Killer cell lectin receptor G, member 1  | PMID: 20201037  |                      |             |              |              |                |              |
|                             | SULT1B1                              | Sulfotransferase 1B 1                    | PMID: 9291833   |                      |             |              |              |                |              |
|                             | RNU4-2                               | RNA, U4 small nuclear 2                  | None            |                      |             |              |              | X              |              |
|                             | SNORD3A                              | RNA, C/D box, small nucleolar 3A         | None            |                      |             |              |              | X              |              |
|                             | ACKR3                                | CXCR7                                    | PMID: 16940167  | X                    |             |              |              |                |              |
|                             | FST                                  | Follistatin                              | PMID: 21689628  | X                    |             |              |              |                |              |
|                             | MGARP                                | Mitochondrial glutamic acid-rich protein | PMID: 23209644  |                      |             |              |              |                |              |
|                             | GPR126                               | G protein coupled receptor 26            | PMID: 15225624  |                      |             |              | X            |                |              |
|                             | RGS4                                 | Regulator of G protein signaling 4       | PMID: 15548600  | X                    | X           |              |              |                |              |
|                             | SNORD3D                              | RNA, C/D box, small nucleolar 3D         | None            |                      |             |              |              | X              |              |
|                             | AMTN                                 | Amelotin                                 | PMID: 21154245  |                      |             |              |              |                |              |
|                             | ARL4A                                | ADP-ribosylation factor-like 4A          | PMID: 21930703  |                      |             |              | X            |                |              |
|                             | CDH11                                | Cadherin 11                              | PMID: 23951053  |                      |             | X            |              |                |              |
|                             | HTR2B                                | Serotonin receptor 2B                    | PMID: 19308295  | X                    |             |              |              |                |              |
|                             | AKR1C3                               | Aldo-keto reductase 1, C3                | PMID: 21134280  | X                    |             |              |              |                |              |
|                             | RNVU1-7                              | RNA, variant U1 small nuclear 7          | None            |                      |             |              |              | X              |              |
|                             | RNU1-3                               | RNA, U1 small nuclear 3                  | None            |                      |             |              |              | X              |              |
|                             | NDRG4                                | NDRG4                                    | PMID: 22869042  | X                    |             |              |              |                |              |
|                             | RNVU1-18                             | RNA, variant U1 small nuclear 18         | None            |                      |             |              |              | X              |              |
|                             | RNU1-1                               | RNA, U1 small nuclear 1                  | PMID: 8527382   |                      |             |              |              | X              |              |
|                             | RN7SK                                | RNA, 7SK                                 | PMID: 22102912  |                      |             |              |              | X              |              |
| RNU6-1                      | RNA, U6 small nuclear 1              | PMID: 24435880                           |                 |                      |             |              | X            |                |              |
| RNU6-15P                    | RNA, U6 small nuclear 15, pseudogene | None                                     |                 |                      |             |              | X            |                |              |
| CLDN11                      | Claudin-11                           | PMID: 19622796                           |                 |                      |             |              |              |                |              |

Gene number: 30, 17, 12, 11, 6, 5  
 % Total: 37.50%, 21.25%, 15%, 13.75%, 7.50%, 6.25%
