# Supplementary material
Source: PubMed Central journal article supplement (PMC4614128)
Supplement: 0358ec39cc5b76f78f5dfafcb234f4cb_brain-2014-01842-File015.pdf [file 0358ec39cc5b76f78f5dfafcb234f4cb_brain-2014-01842-File015.pdf]

## Table S3

### b. Genes downregulated by VEGF-A+DDR together in human CMVEC cultures

| <i>Gene Symbol</i> | <i>Name</i>                             | <i>PMID</i>    | <i>Angiogenesis</i> | <i>Vegf</i> | <i>ncRNA</i> | <i>Miqr.</i> | <i>Prolif.</i> | <i>IFN</i> | <i>Perm.</i> | <i>Diffn.</i> |
|--------------------|-----------------------------------------|----------------|---------------------|-------------|--------------|--------------|----------------|------------|--------------|---------------|
| ZNF295-AS1         | Zinc finger 295 - antisense RNA         | None           |                     |             |              |              |                |            |              |               |
| ZNF467             | Zinc finger protein 467                 | PMID: 21123171 |                     |             |              |              |                |            |              | X             |
| RNU6ATAC           | RNA, U6atac small nuclear               | PMID: 11971955 |                     |             | X            |              |                |            |              |               |
| TLL1               | Tolloid-like 1                          | PMID: 15591058 | X                   |             |              |              |                |            |              |               |
| LEPREL1            | Leprecan-like 1                         | PMID: 24172257 |                     |             |              |              |                |            |              |               |
| GDF3               | Growth differentiation factor-3         | PMID: 17610369 |                     |             |              |              | X              |            |              | X             |
| NRG1               | Neuregulin-1                            | PMID: 18728681 | X                   |             |              |              |                |            |              |               |
| TRIM78P            | Tripartite motif 78, pseudogene         | None           |                     |             |              |              |                |            |              |               |
| KLRG1              | Killer cell lectin receptor G, member 1 | PMID: 20201037 |                     |             |              |              |                |            |              |               |
| OAS1               | 2'-5'-oligoadenylate synthetase 1       | PMID: 23558133 |                     |             |              |              |                | X          |              |               |
| USP18              | Ubiquitin-specific protease 18          | PMID: 24533902 |                     |             |              |              |                | X          |              |               |
| RNU4-2             | RNA, U4 small nuclear 2                 | None           |                     |             | X            |              |                |            |              |               |
| KAT2B              | Lysine acetyltransferase                | PMID: 19710011 |                     |             |              |              |                |            |              |               |
| GPER1              | G protein coupled estrogen receptor     | PMID: 21273787 |                     |             |              |              | X              |            |              |               |
| PAFAH1B3           | PAF acetylhydrolase 1B3                 | PMID: 10634803 | X                   | X           |              |              |                |            |              |               |
| SNORD3A            | RNA, C/D box, small nucleolar 3A        | None           |                     |             | X            |              |                |            |              |               |
| PTX3               | Pentraxin 3                             | PMID: 20506099 | X                   |             |              |              |                |            |              |               |
| SP110              | Sp110 nuclear body protein              | PMID: 16648851 |                     |             |              |              |                |            |              |               |
| SLC25A28           | Mitoferrin 2                            | PMID: 19075006 |                     |             |              |              |                |            |              |               |
| HIST1H2BK          | Histone H2B member K                    | PMID: 1768865  |                     |             |              |              |                |            |              |               |
| HERC5              | HERC5                                   | PMID: 24257616 |                     |             |              |              |                | X          |              |               |
| IFIH1              | Interferon-induced with helicase C 1    | PMID: 20121398 |                     |             |              |              |                | X          |              |               |
| IRF7               | Interferon regulatory factor 7          | PMID: 23401273 | X                   |             |              |              |                | X          |              |               |
| NNAT               | Neuronatin                              | PMID: 22624064 |                     |             |              |              |                |            |              |               |
| EPST11             | Epithelial-stromal interaction 1        | PMID: 11991720 |                     |             |              |              |                |            |              |               |
| RNU1-28P           | RNA, U1 small nuclear 28 pseudogene     | None           |                     |             | X            |              |                |            |              |               |
| GPR126             | G protein coupled receptor 26           | PMID: 15225624 |                     |             |              | X            |                |            |              |               |
| RGS4               | Regulator of G protein signaling 4      | PMID: 15548600 | X                   | X           |              |              |                |            |              |               |
| SNORD3D            | RNA, C/D box, small nucleolar 3D        | None           |                     |             |              |              |                |            |              |               |
| NFKBIA             | I kappa B alpha                         | PMID: 19074890 | X                   |             |              |              |                |            |              |               |
| ITPR1P             | DANGER                                  | PMID: 20053891 |                     |             |              |              |                |            |              |               |
| ARL4A              | ADP-ribosylation factor-like 4A         | PMID: 21930703 |                     |             |              |              |                |            |              |               |
| CDH11              | Cadherin 11                             | PMID: 23951053 |                     |             |              | X            |                |            |              |               |
| HTR2B              | Serotonin receptor 2B                   | PMID: 19308295 | X                   |             |              |              |                |            |              |               |
| AKR1C3             | Aldo-keto reductase 1, C3               | PMID: 21134280 | X                   |             |              |              |                |            |              |               |
| IFI44              | Interferon-induced 44                   | PMID: 19478064 |                     |             |              |              | X              |            |              |               |
| IFI44L             | IFI44-like                              | PMID: 19478064 |                     |             |              |              | X              |            |              |               |
| RNVU1-7            | RNA, variant U1 small nuclear 7         | None           |                     |             | X            |              |                |            |              |               |
| RNU1-3             | RNA, U1 small nuclear 3                 | None           |                     |             | X            |              |                |            |              |               |
| NDRG4              | NDRG4                                   | PMID: 22869042 | X                   |             |              |              |                |            |              |               |
| SULF1              | Sulfatase 1                             | PMID: 16778174 | X                   |             |              |              |                |            |              |               |
| RNVU1-18           | RNA, variant U1 small nuclear 18        | None           |                     |             | X            |              |                |            |              |               |
| RNU1-1             | RNA, U1 small nuclear 1                 | PMID: 8527382  |                     |             | X            |              |                |            |              |               |
| RN7SK              | RNA, 7SK                                | PMID: 22102912 |                     |             | X            |              |                |            |              |               |
| IER3               | Immediate early response 3              | PMID: 11782530 |                     |             |              |              |                |            |              |               |
| CCL2               | Mcp-1                                   | PMID: 10891427 | X                   |             |              |              |                |            |              |               |
| STAT1              | Stat1                                   | PMID: 16585190 | X                   |             |              |              |                |            | X            |               |
| DCBLD2             | ESDN                                    | PMID: 11447234 |                     | X           |              |              |                |            |              |               |
| IFI6               | Interferon alpha-inducible 6            | PMID: 17823654 |                     |             |              |              |                |            | X            |               |
| TFPI               | Tissue factor pathway inhibitor         | PMID: 24620349 |                     |             |              |              |                |            |              |               |
| RNU6-1             | RNA, U6 small nuclear 1                 | PMID: 24435880 |                     |             | X            |              |                |            |              |               |
| RNU6-15P           | RNA, U6 small nuclear 15, pseudogene    | None           |                     |             | X            |              |                |            |              |               |
| MX1                | MX dynamin-like GTPase 1                | PMID: 23558133 |                     |             |              |              |                | X          |              |               |
| ISG15              | ISG15 ubiquitin-like modifier           | PMID: 22100648 |                     |             |              |              |                | X          |              |               |
| CLDN11             | Claudin-11                              | PMID: 19622796 |                     |             |              |              |                |            |              |               |

Most strongly downregulated

Gene number (up- and downregulated)      36      20      11      10      10      9      7      7  
 % Total      30.25%      16.8%      9.24%      8.4%      8.4%      6.72%      5.9%      5.9%
