# Supplementary material
Source: PubMed Central journal article supplement (PMC4614128)
Supplement: be2946997819a841003453cf34404067_brain-2014-01842-File013.pdf [file be2946997819a841003453cf34404067_brain-2014-01842-File013.pdf]

## Table S2

### DDR-regulated genes in human CNS microvascular endothelial cultures

|                             | <i>Gene Symbol</i>                  | <i>Name</i>                                                  | <i>PMID</i>    | <i>Angiogenesis</i> | <i>Migr.</i> | <i>Prolif.</i> | <i>Viability</i> | <i>Veaf</i> | <i>Perm.</i> |
|-----------------------------|-------------------------------------|--------------------------------------------------------------|----------------|---------------------|--------------|----------------|------------------|-------------|--------------|
| Most strongly upregulated   | MGARP                               | Mitochondrial glutamic acid-rich protein                     | PMID: 23209644 |                     |              |                |                  |             |              |
|                             | SNORA12                             | Small nucleolar RNA, H/ACA box 12                            | PMID: 24947756 |                     |              |                |                  |             |              |
|                             | ADIRF                               | APM2/C10orf116                                               | PMID: 23467766 |                     |              | X              | X                |             |              |
|                             | HMOX1                               | Heme oxygenase 1                                             | PMID: 15345146 | X                   |              |                |                  | X           |              |
|                             | TP53INP1                            | p53-dependent inducible nuclear protein 1                    | PMID: 11511362 |                     |              |                | X                |             |              |
|                             | TRMT5                               | tRNA methyltransferase 5                                     | PMID: 15248782 |                     |              |                |                  |             |              |
|                             | AMTN                                | Amelotin                                                     | PMID: 21154245 |                     |              |                |                  |             |              |
|                             | TXNIP                               | Thioredoxin-interacting protein                              | PMID: 23393387 | X                   |              |                |                  | X           |              |
|                             | SPOCD1                              | SPOC domain containing 1                                     | None           |                     |              |                |                  |             |              |
|                             | NENF                                | Neudesin                                                     | PMID: 16547973 |                     |              | X              |                  |             |              |
|                             | GCNT1                               | Glucosaminyl (N-acetyl) transferase 1                        | PMID: 24509081 |                     | X            |                |                  |             |              |
|                             | DPYSL3                              | Dihydropyrimidinase-like 3 / CRMP4                           | PMID: 23929741 |                     |              |                |                  | X           |              |
|                             | CD44                                | CD44                                                         | PMID: 23504212 |                     | X            |                |                  |             | X            |
|                             | CXCL1                               | GRO-alpha / CXCL1                                            | PMID: 16618733 | X                   |              |                |                  |             |              |
|                             | SLC40A1                             | Ferroportin 1                                                | PMID: 14684575 |                     |              |                |                  |             |              |
|                             | GLIPR2                              | GLI pathogenesis related-2                                   | PMID: 23516513 |                     |              |                |                  |             |              |
|                             | TJP1                                | ZO-1                                                         | PMID: 15905957 |                     |              |                |                  |             | X            |
|                             | LIMCH1                              | LIM and calponin homology domains 1                          | None           |                     |              |                |                  |             |              |
|                             | DAAM1                               | Dishevelled activator morphogenesis 1                        | PMID: 20351293 | X                   |              |                |                  |             |              |
|                             | LIMA1                               | LIM domain and actin binding 1 / EPLIN                       | PMID: 18093941 |                     | X            |                |                  |             |              |
| CASC15                      | Cancer susceptibility candidate 15  | PMID: 18463370                                               |                |                     |              |                |                  |             |              |
| TKT                         | Transketolase                       | PMID: 19290028                                               |                |                     |              |                |                  |             |              |
| ITPR2                       | IP3 receptor 2                      | PMID: 24797322                                               |                |                     |              |                |                  |             |              |
| Most strongly downregulated | MPHOSPH6                            | M-phase phosphoprotein 6                                     | None           |                     |              |                |                  |             |              |
|                             | RGCC                                | Regulator of cell cycle                                      | PMID: 11687586 |                     |              | X              |                  |             |              |
|                             | APP                                 | Amyloid precursor protein                                    | PMID: 24961795 |                     |              |                |                  |             |              |
|                             | HTR2B                               | Serotonin receptor 2B                                        | PMID: 19308295 | X                   |              |                |                  |             |              |
|                             | ASPHD2                              | Aspartate beta-hydroxylase containing 2                      | None           |                     |              |                |                  |             |              |
|                             | HSD17B2                             | Hydroxysteroid (17β) dehydrogenase 2                         | PMID: 22045753 |                     |              |                |                  |             |              |
|                             | GPER1                               | G protein coupled estrogen receptor                          | PMID: 21273787 |                     |              | X              |                  |             |              |
|                             | FEN1                                | Flap structure-specific endonuclease 1                       | PMID: 20929870 |                     |              | X              | X                |             |              |
|                             | FDFT1                               | Farnesyl-diphosph. farnesyltransferase 1                     | PMID: 8020937  |                     |              |                |                  |             |              |
|                             | ITPRIP                              | DANGER                                                       | PMID: 20053891 |                     |              |                | X                |             |              |
|                             | FABP4                               | Fatty acid BP 4                                              | PMID: 24939870 | X                   |              |                |                  | X           |              |
|                             | ATP1B1                              | ATPase, Na <sup>+</sup> /K <sup>+</sup> transporting, beta 1 | PMID: 15516538 |                     |              |                |                  |             |              |
|                             | C2CD4B                              | C2 calcium-dependent domain 4B / NLF2                        | PMID: 15527968 |                     |              |                |                  |             |              |
|                             | ITGAE                               | Alpha E integrin / CD103                                     | PMID: 11207310 |                     | X            |                |                  |             |              |
|                             | ITGA10                              | Alpha 10 integrin                                            | PMID: 16684505 |                     | X            |                |                  |             |              |
| ANGPT2                      | Angiotensinogen-converting enzyme 2 | PMID: 16056241                                               |                |                     |              |                |                  | X           |              |
| GDF3                        | Growth differentiation factor-3     | PMID: 17610369                                               |                |                     | X            |                |                  |             |              |
| CD34                        | CD34                                | PMID: 18987355                                               |                | X                   |              |                |                  |             |              |
| <b>Gene number</b>          |                                     |                                                              |                | <b>6</b>            | <b>6</b>     | <b>6</b>       | <b>4</b>         | <b>4</b>    | <b>3</b>     |
| <b>% Total</b>              |                                     |                                                              |                | <b>14.6%</b>        | <b>14.6%</b> | <b>14.6%</b>   | <b>9.8%</b>      | <b>9.8%</b> | <b>7.3%</b>  |
