# Supplementary material
Source: PubMed Central journal article supplement (PMC4614128)
Supplement: d9c206f657889adccabba1f4dd40db86_brain-2014-01842-File014.pdf [file d9c206f657889adccabba1f4dd40db86_brain-2014-01842-File014.pdf]

# Table S3

## a. Genes upregulated by VEGF-A+DDR together in human CMVEC cultures

| <i>Gene Symbol</i> | <i>Name</i>                            | <i>PMID</i>    | <i>Angiogenesis</i> | <i>Veaf</i> | <i>ncRNA</i> | <i>Migr.</i> | <i>Prolif.</i> | <i>IFN</i> | <i>Perm.</i> | <i>Diffn.</i> |
|--------------------|----------------------------------------|----------------|---------------------|-------------|--------------|--------------|----------------|------------|--------------|---------------|
| RGCC               | Regulator of cell cycle                | PMID: 11687586 |                     |             |              |              | X              |            |              |               |
| ESM1               | Endocan                                | PMID: 23243026 | X                   | X           |              |              |                |            |              |               |
| CD93               | CD93                                   | PMID: 22786655 | X                   | X           |              | X            |                |            |              |               |
| LXN                | Latexin                                | PMID: 17220891 |                     |             |              |              | X              |            |              | X             |
| PODXL              | Podocalyxin-like                       | PMID: 18456258 |                     |             |              | X            |                |            |              |               |
| APLN               | Apelin                                 | PMID: 16750822 | X                   |             |              |              |                |            |              |               |
| AKAP12             | SSeCKS                                 | PMID: 12808449 |                     |             |              |              |                |            | X            |               |
| TNFSF4             | Gp34                                   | PMID: 10914497 |                     |             |              |              | X              |            |              |               |
| ETS1               | Ets-1 transcription factor             | PMID: 11795259 | X                   |             |              |              |                |            |              |               |
| ANGPT2             | Angiopoietin-2                         | PMID: 16056241 |                     |             |              |              |                |            | X            |               |
| KLF6               | Kruppel-like factor 6                  | PMID: 11752579 |                     |             |              |              | X              |            |              | X             |
| MGST2              | microsomal glutathione S-transferase 2 | PMID: 11322876 |                     |             |              |              |                |            |              |               |
| C1orf54            | C1orf54                                | None           |                     |             |              | X            |                |            |              |               |
| GPR116             | Gpr116                                 | PMID: 24008316 | X                   |             |              |              |                |            |              |               |
| C10orf10           | DEPP                                   | PMID: 15977181 |                     |             |              |              |                |            | X            |               |
| SLC12A2            | Nkcc1                                  | PMID: 20035575 |                     |             |              |              |                |            |              |               |
| PNP                | Purine nucleoside phosphorylase        | PMID: 8987089  |                     |             |              |              |                |            |              |               |
| ITGA6              | Integrin alpha 6                       | PMID: 20570893 | X                   | X           |              |              |                |            |              |               |
| TCF4               | Tcf4                                   | PMID: 20231428 | X                   |             |              |              |                |            | X            |               |
| HECW2              | Nedl2                                  | PMID: 24163370 |                     |             |              |              | X              |            |              |               |
| PGF                | PIGF, placental growth factor          | PMID: 1924389  | X                   | X           |              |              |                |            |              |               |
| SULF2              | Sulfatase 2                            | PMID: 16417632 |                     | X           |              |              |                |            |              |               |
| CTNNB1             | Beta catenin                           | PMID: 24590145 |                     |             |              |              |                |            | X            |               |
| NEDD9              | Neural precursor, dev. downregulated-9 | PMID: 20498643 |                     |             |              | X            |                |            |              |               |
| MMP10              | Matrix metalloproteinase 10            | PMID: 20432469 | X                   | X           |              |              |                |            |              |               |
| NT5E               | CD73                                   | PMID: 9015312  |                     |             |              |              |                |            | X            |               |
| CD55               | Decay accelerating factor              | PMID: 1688581  |                     |             |              |              |                |            |              |               |
| JAK1               | Janus kinase 1                         | PMID: 15153787 |                     | X           |              |              |                |            |              |               |
| PDE4B              | Phosphodiesterase 4B                   | PMID: 25019986 |                     |             |              |              |                |            | X            |               |
| RASGRP3            | Ras guanine-releasing protein 3        | PMID: 15572660 | X                   |             |              |              |                |            |              |               |
| NDRG1              | N-myc downstream regulated             | PMID: 16778198 | X                   |             |              |              |                |            |              | X             |
| PARPBP             | PARP-1 binding protein                 | PMID 20931645  |                     |             |              |              |                |            |              |               |
| PLXNA2             | Plexin A2                              | PMID: 15739224 |                     | X           |              |              |                |            |              |               |
| CXCR4              | Chemokine receptor CXCR4               | PMID: 9634237  | X                   | X           |              |              |                |            |              |               |
| FAM89A             | FAM89A                                 | None           |                     |             |              |              |                |            |              |               |
| HLX                | Homeobox TF HLX1                       | PMID: 21224470 | X                   | X           |              |              |                |            |              |               |
| KIT                | c-Kit                                  | PMID: 14515175 | X                   | X           |              |              |                |            |              |               |
| SORBS2             | ArgBP2                                 | PMID: 15659545 |                     |             |              |              |                |            |              |               |
| VASH1              | Vasohibin1                             | PMID: 23100270 | X                   | X           |              |              |                |            |              |               |
| CASC15             | Cancer susceptibility candidate 15     | PMID: 18463370 |                     |             |              |              |                |            |              |               |
| SYNM               | Synemin                                | PMID: 19124017 |                     |             |              | X            |                |            |              |               |
| TSPAN18            | Tetraspanin 18                         | PMID: 24582980 |                     |             |              |              |                |            |              |               |
| PLCB1              | Phospholipase C beta 1                 | PMID: 11741951 | X                   | X           |              |              |                |            |              |               |
| PDGFD              | Platelet derived growth factor -d      | PMID: 19028801 |                     |             |              |              |                |            |              | X             |
| RNF19A             | Ring finger 19 / Dorfin                | PMID: 11237715 |                     |             |              |              |                |            |              |               |
| PCDH17             | Protocadherin 17                       | PMID: 23684785 |                     |             |              |              |                |            |              |               |
| TMEM154            | Transmembrane protein 154              | None           |                     |             |              |              |                |            |              |               |
| LRRRC8B            | Leucine-rich repeat-containing 8B      | PMID: 24782309 |                     |             |              |              |                |            |              |               |
| DUSP5              | Dual-specificity phosphatase-5         | PMID: 19741200 |                     |             |              |              | X              |            |              |               |
| UACA               | Nucling                                | PMID: 14961764 |                     |             |              |              |                |            |              |               |
| AZM                | Alpha 2 macroglobulin                  | PMID: 10862607 |                     | X           |              |              |                |            |              |               |
| GMFG               | Glia maturation factor                 | PMID: 16873721 | X                   |             |              |              |                |            |              |               |
| TBC1D8             | TBC1 domain, D8                        | PMID: 21347333 |                     |             |              |              |                |            |              |               |
| SPRY1              | Sprouty 1                              | PMID: 14515177 | X                   |             |              |              |                |            |              |               |
| SPRY4              | Sprouty 4                              | PMID: 20835243 | X                   | X           |              |              |                |            |              |               |
| LYVE1              | Lymphatic endothelial hyaluronan R1    | PMID: 12554094 |                     |             |              |              | X              |            |              |               |
| NID2               | Nidogen 2                              | PMID: 12215539 | X                   |             |              |              |                |            |              |               |
| PRDM1              | BLIMP1                                 | PMID: 24477914 |                     |             |              |              |                |            |              | X             |
| MEF2C              | Myocyte enhancer factor 2c             | PMID: 24988463 | X                   |             |              |              |                |            |              |               |
| PALD1              | Paladin 1                              | PMID: 22354871 | X                   |             |              |              |                |            |              |               |
| MYCN               | N-Myc                                  | PMID: 10969812 | X                   |             |              |              |                |            |              |               |
| PCDH19             | Protocadherin 19                       | PMID: 22704920 |                     |             |              |              |                |            |              |               |
| RASD1              | Dexamethasone-induced RAS              | PMID: 11086993 |                     |             |              |              |                |            |              |               |
| PCDH12             | VE-cadherin 2                          | PMID: 9651350  |                     |             |              |              |                |            | X            |               |

Most strongly upregulated
