# Supplementary material
Source: PubMed Central journal article supplement (PMC4614128)

**Figure S2**

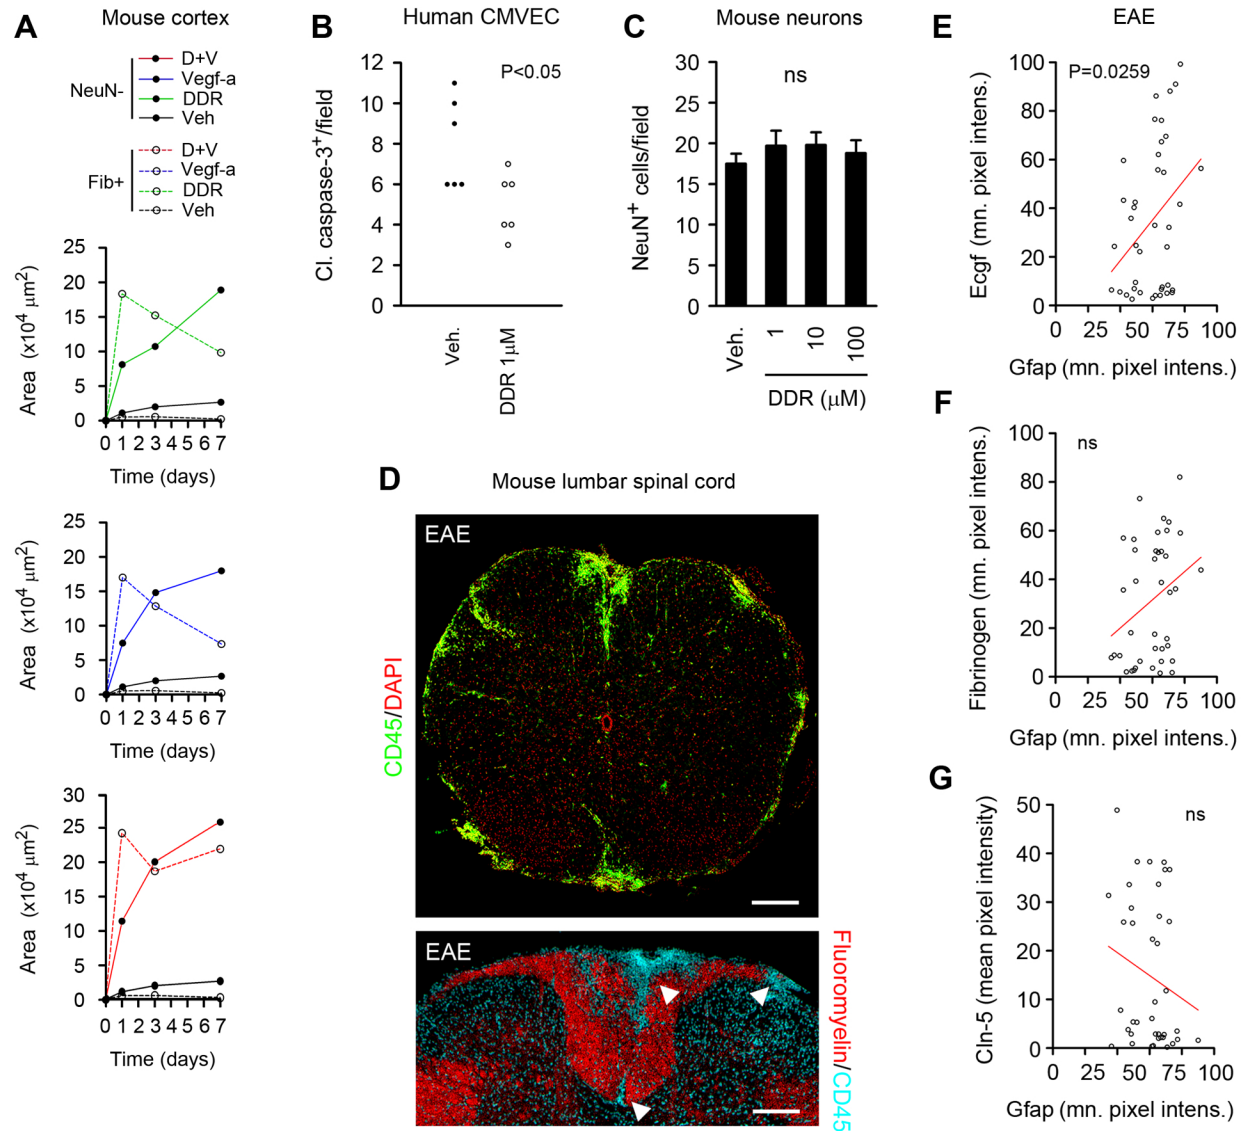

Supplement: 60946fb3d0634d421b0f16fb13a51291_brain-2014-01842-File010.pdf [file 60946fb3d0634d421b0f16fb13a51291_brain-2014-01842-File010.pdf]

**Figure S3**

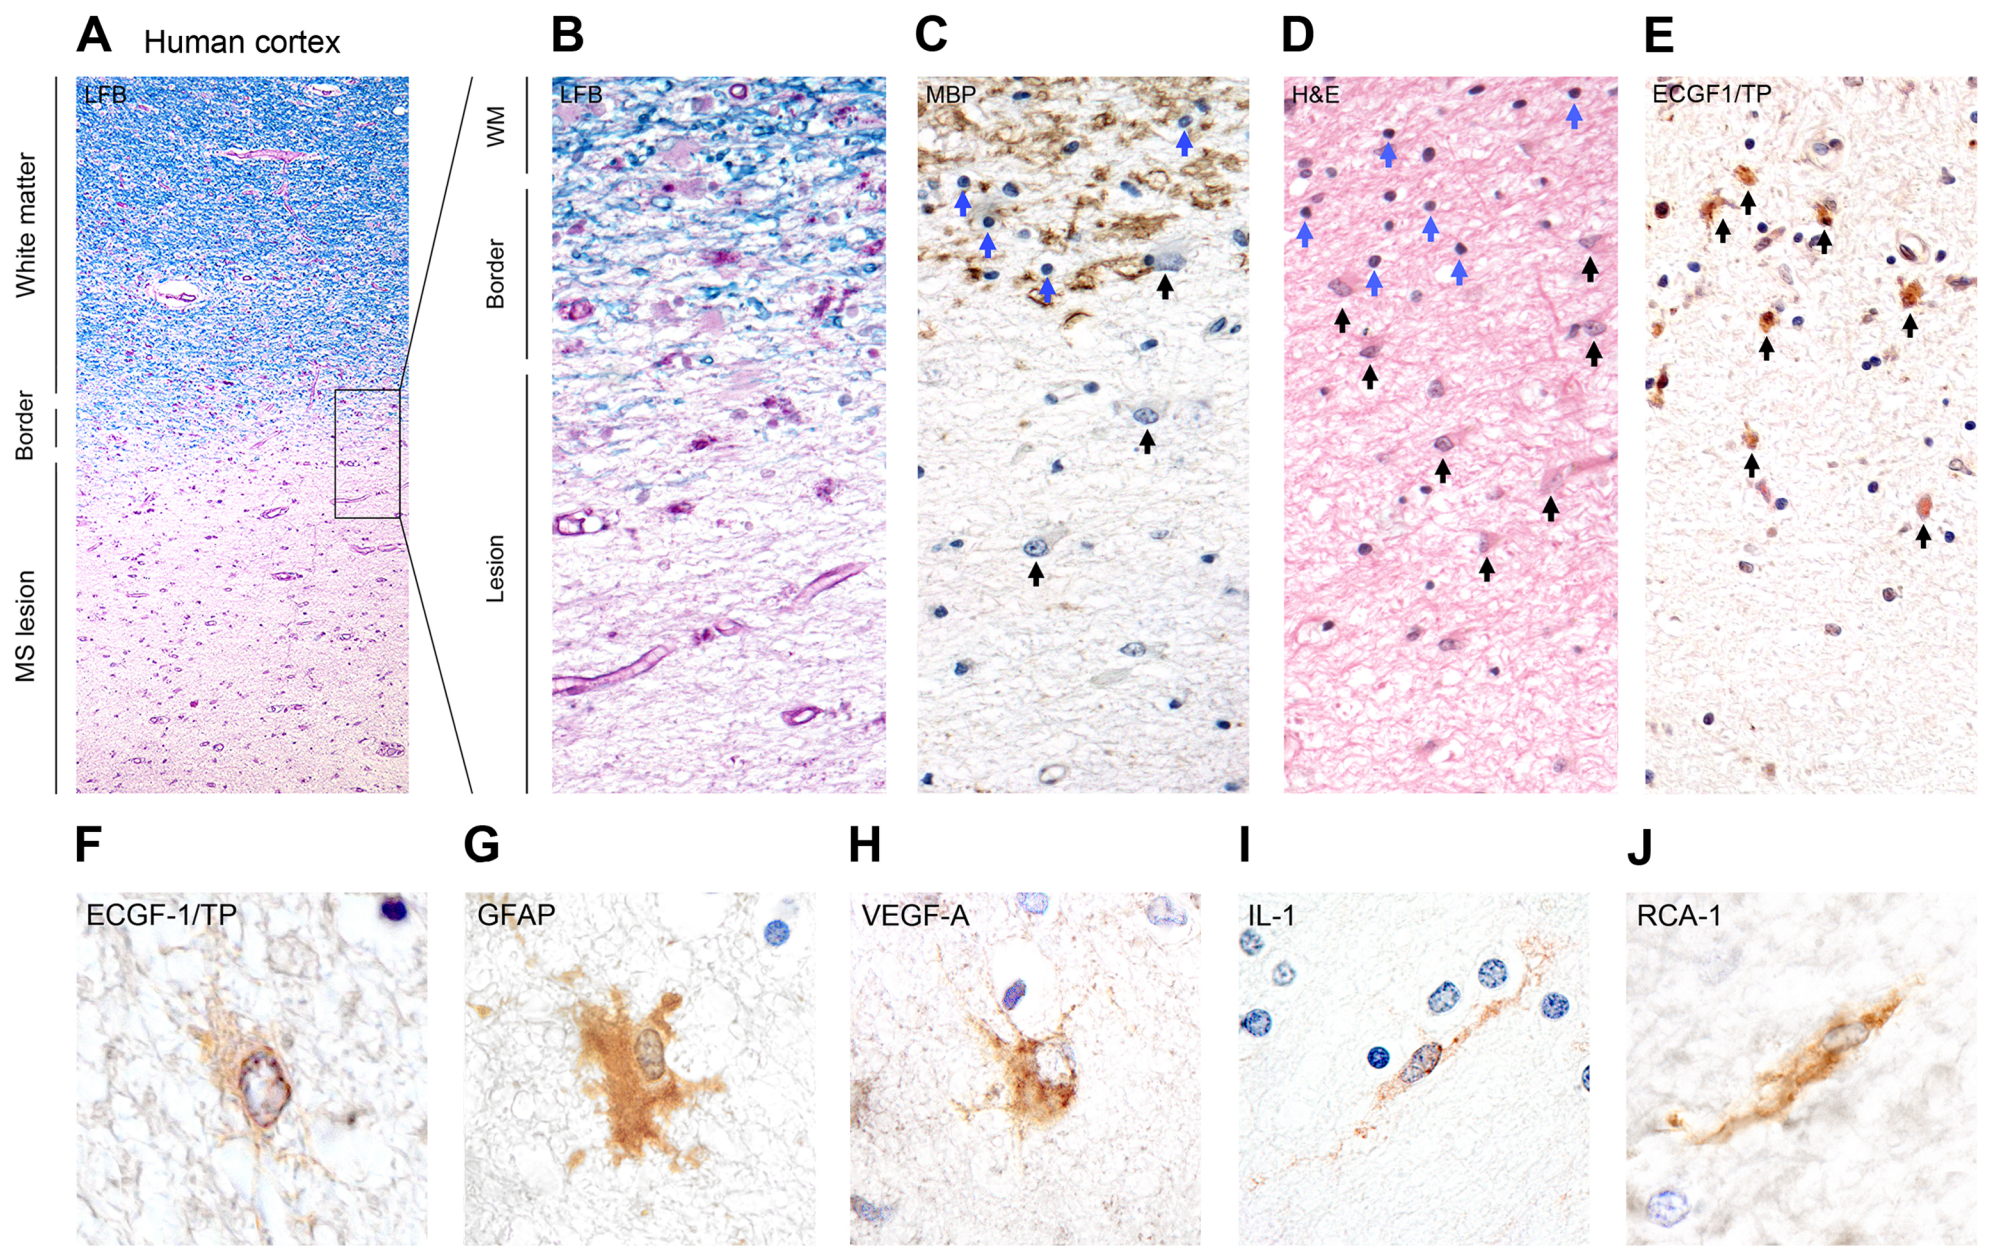

Supplement: 8ae048ea403b10b4298b7c18141be89c_brain-2014-01842-File011.pdf [file 8ae048ea403b10b4298b7c18141be89c_brain-2014-01842-File011.pdf]

**Figure S1**

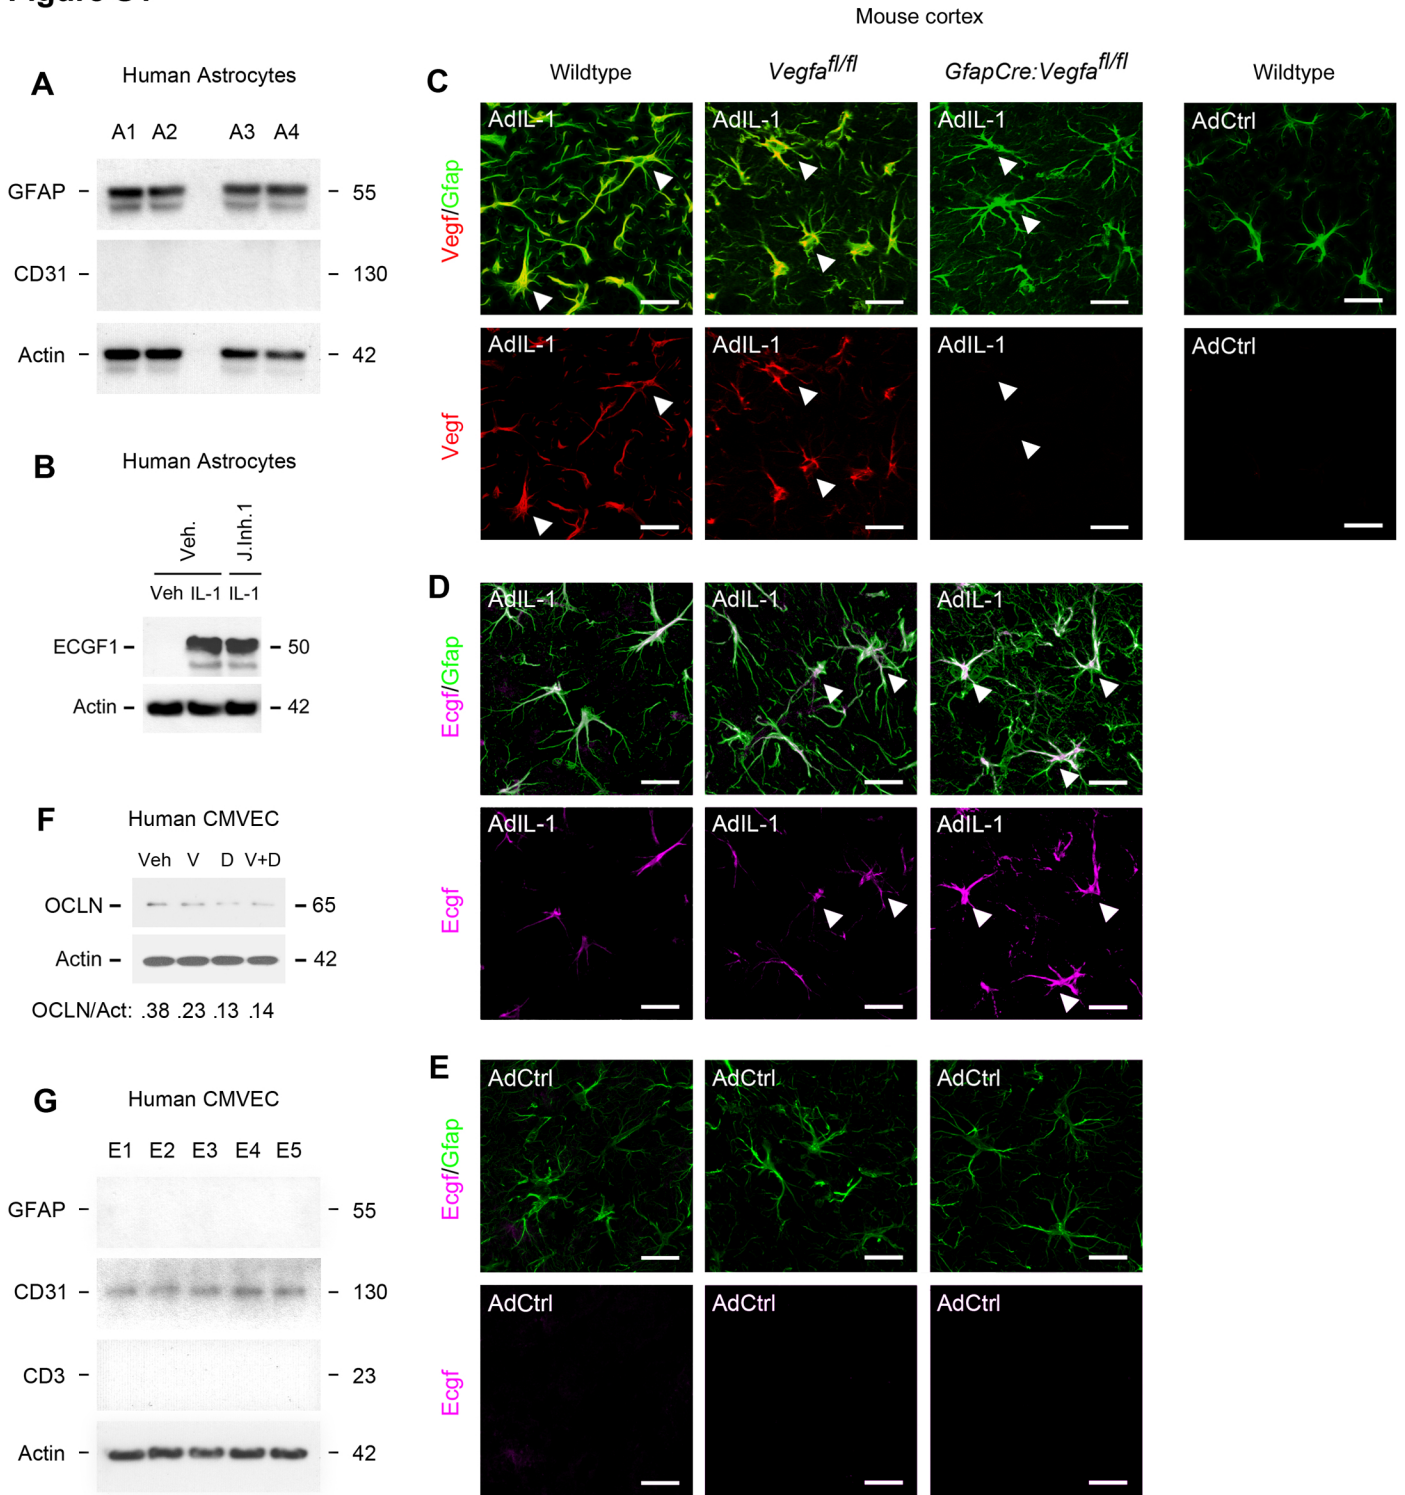

Supplement: d635fb266f26e90de21dccfce0a1ff39_brain-2014-01842-File009.pdf [file d635fb266f26e90de21dccfce0a1ff39_brain-2014-01842-File009.pdf]
